# Supplementary material for: Visible room-temperature phosphorescence of pure organic crystals via a radical-ion-pair mechanism
Source: Royal Society of Chemistry journal article supplement (doi:10.1039/c5cp01203a), 2015-01-01
Supplement: c5cp01203a1.pdf [file c5cp01203a1.pdf]

## **Electronic Supplementary Information**

### **Visible room-temperature phosphorescence of pure organic crystals via a radical-ion-pair mechanism**

Shinichi Kuno, Hiroshi Akeno, Hiroyuki Ohtani, and Hideya Yuasa\*

Department of Life Science, Graduate School of Bioscience and Biotechnology, Tokyo Institute of Technology, 4259 J2-10, Nagatsutacho, Midoriku, Yokohama 226-8501, Japan

\*Corresponding author. E-mail: [hyuasa@bio.titech.ac.jp](mailto:hyuasa@bio.titech.ac.jp)

### General experimental details

Fluorescence and phosphorescence spectra and phosphorescence lifetime were measured on JASCO FP-8500 fluorospectrometer with a 150-W xenon lamp as an excitation light source. A disk cell ( $\phi$  5.5 mm, thickness 1–3 mm) was used for solid samples (4–20 mg). All the measurements, unless otherwise stated, were carried out by a photomultiplier voltage of 175 V (248 V for 3Cl), excitation and emission band widths of 5 nm, a response of 0.5 s, a data acquisition interval of 0.5 nm for fluorescence or 0.2 nm for phosphorescence, and a scan speed of 500 nm/min. The chopper rotation for phosphorescence excitation and emission measurements was adjusted as follows: a shutter open-close cycle of 100 ms, an acquisition delay time of 50 ms, an acquisition period of 25 ms, and an acquisition repeat of two cycles. The background corrections of all the emission and excitation spectra were performed with a combination of a D<sub>2</sub> lamp (JASCO ESC-843, 30 W, 200–360 nm) and a halogen lamp (JASCO ESC-842, 20 W, 350–750 nm). For the measurement of luminescence properties, all the samples were purified by recrystallization: IPA (Sigma-Aldrich, 99%) and **IPAd<sub>4</sub>** (CDN Isotopes Inc., 99.4 atom%D) were recrystallized from methanol (LC/MS grade, Wako Pure Chemical Industries, Ltd.); **IPAd<sub>2</sub>** was recrystallized from methanol-*d*<sub>4</sub> (NMR solvent, 99.8% D, Kanto Chemical Co., Inc.); TPA (Tokyo Chemical Industry Co., Ltd., >99.0%), 4-fluorobenzoic acid (4FBz, Tokyo Chemical Industry Co., Ltd., >98.0%), 4-chlorobenzoic acid (4ClBz, Tokyo Chemical Industry Co., Ltd., >99.0%), 4-bromobenzoic acid (4BrBz, Tokyo Chemical Industry Co., Ltd., >98.0%), and 4-iodobenzoic acid (4IBz, Tokyo Chemical Industry Co., Ltd., >98.0%) were recrystallized from ethanol (spectroscopy grade, Wako Pure Chemical Industries, Ltd.; for TPA, special grade, Kanto Chemical Co., Inc.); PMA (Tokyo Chemical Industry Co., Ltd., >98.0%), benzoic acid (Bz, Kanto Chemical Co., Inc., >99.5%), benzoic acid-*d*<sub>5</sub> (Bzd<sub>5</sub>, Cambridge Isotope Laboratories Inc., 98%), and 2- and 3-halogenated benzoic acids (2FBz, 2ClBz, 2BrBz, 2IBz, 3FBz, 3ClBz, 3BrBz, 3IBz, Tokyo Chemical Industry Co., Ltd., >98.0%; for 3ClBz, >99.0%) were recrystallized from water (Millipore Milli-Q Integral-3); benzoic acid-*d*<sub>1</sub> (Bzd<sub>1</sub>) was recrystallized from D<sub>2</sub>O (NMR solvent, 99.8% D, Kanto Chemical Co., Inc.).

### Lifetime measurement

For all the compounds except 2IBz and 4IBz, the temporal change in emission intensity after 1-s irradiation was measured consecutively for 10 times. For 2IBz and 4IBz, the chopper rotation mode was used with a “shutter cycle”–“delay time”–“acquisition period” combination of 25–11–7, 50–20–15, or 100–40–30 (ms), and an acquisition repeat of 10. The decay curve thus obtained was accumulated and analyzed by a data analysis software, Igor Pro (ver 6.2.2.0, WaveMetrics, Inc.).

For a multiexponential decay curve, the rightmost part of its semilog curve was fitted to a straight line, the semilog curve subtracted by the fitted line, and the residual semilog curve again subjected to a linear regression analysis at the rightmost part; these operations were repeated until the residual semilog curve became linear or a further repeat was statistically insignificant due to a small data points number. Lifetime  $\tau_n$  and a contribution coefficient  $A_n$  were obtained for each regression analysis using equation (1) (emission intensity  $I(t)$  vs elapsed time  $t$ ).

$$I(t) = A_1 e^{-t/\tau_1} + A_2 e^{-t/\tau_2} + A_3 e^{-t/\tau_3} + \dots \quad (1)$$

### Quantum yield measurement

Quantum yields were measured with an integrating sphere unit (JASCO ILF-835, 100 mm  $\phi$ ) on FP-8500. A sample was put in an all-quartz cell (10  $\times$  3  $\times$  10 mm), and the excitation and emission band widths were adjusted at 10 nm. The photomultiplier voltage was adjusted so that the irradiation peak intensity was settled between 4000 and 8000 arb. units. The quantum yield  $\Phi$  and absorbance  $A$  were calculated by equations (2) and (3):

$$\Phi = \frac{N_{em}}{N_{abs}} = \frac{E_1 - E_2 \times L_2/L_3}{L_1 \times A} \quad (2), \quad A = \frac{L_3 - L_2}{L_3} \quad (3)$$

$N_{em}$  and  $N_{abs}$  are the numbers of photons emitted from and absorbed by the sample, respectively. The emission strength parameters,  $L_n$  and  $E_n$ , were determined by the integrated intensity of the corresponding band in the emission spectra. The incident light strength ( $L_1$ ) was obtained with the empty integrating sphere. The sample-scattered light strength ( $L_2$ ) and the gross emission strength of the sample ( $E_1$ ) were measured by using the directly irradiated sample. The wall-scattered light strength ( $L_3$ ) and the indirect emission strength ( $E_2$ ), where the sample was unintendedly irradiated by the wall-scattered light, were obtained with the sample placed away from the incident light path in the integrating sphere.

### Absorption spectra of solids

Absorption spectra of solids were measured by using the same setting, as for the quantum yield measurement with the preinstalled program. Substantial absorption spectra were obtained in the range between 220 and 700 nm. The shorter wavelength gave spike-like noises. Low-temperature phosphorescence measurements were performed with a Jasco PMU-830 liq. N<sub>2</sub> cooling unit and an NMR-tube ( $\phi$  5  $\times$  h 10 mm) or a Jasco PPH-150 disk cell ( $\phi$  7  $\times$  d 0.5 mm).

### **Purification of IPA**

Commercial isophthalic acid (IPA, Sigma-Aldrich, 99%, 5.00 g) was purified through a silica gel column chromatography (Silica Gel 60N, 40-100  $\mu\text{m}$ , Kanto Chemical, Co., Inc.) with  $\text{CHCl}_3$ /methanol/acetic acid (9/1/0.01) as an eluent. The chromatography-purified IPA (1.74 g) was sublimed using a Buchi GKR-50 glass tube oven at 170  $^\circ\text{C}$  under 2 mmHg. The sublimed IPA (1.00 g) was dissolved into an analytical-grade ethanol (Wako Chemical Ltd.) by sonication and filtered through a filter paper. To the filtrate was added 300 mL of ultrapure water (Merck Millipore Milli-Q Integral-3), and the solution was left overnight. The precipitated crystals (605 mg) were collected by filtration. This recrystallization process was repeated three times.

### **Measurement of luminescence intensity change by irradiation power**

The sensor unit of a power meter (Thorlabs PM100A), which has a light-passing hole of the same diameter as the sample disk (5.5 mm), was set in the spectrometer compartment of FP-8500. The excitation light power (350 nm) was modulated by a combination of two light-shielding cards and an excitation bandwidth (2.5-20 nm); the each irradiation power ( $\mu\text{Js}^{-1}$ ) was recorded prior to luminescence measurements.

### **Measurement of luminescence intensity change by external magnetic field**

Modulation of magnetic flux density was carried out with an electromagnet (Fujita FSGP-90,  $\phi$  90  $\times$  h 60 mm) connected to a constant voltage source (Kikusui Model 7354) and a power meter (Keithly 2400 Source Meter). A standard curve of voltage vs magnetic flux density was made with a gauss meter (FW Bell 5180), whose probe tip was put on the center of the electromagnet. The magnetic flux density varied linearly from 1.8 to 80 mT with a voltage variation from 0 to 90 V. A sample was placed on the center of the electromagnet and covered with a crystal glass ( $\phi$  20  $\times$  h 1.0 mm). Irradiation and detection were conducted with a fiber unit (JASCO OBF-832) attached with optical fibers, whose tips were adjusted at 4.5 mm above the sample so that the incident and emitting light courses made a right angle. The phosphorescence intensity was defined as the integrated phosphorescence intensity at 500 nm from 0.1 to 3.0 s after 1-s irradiation at 308 nm.

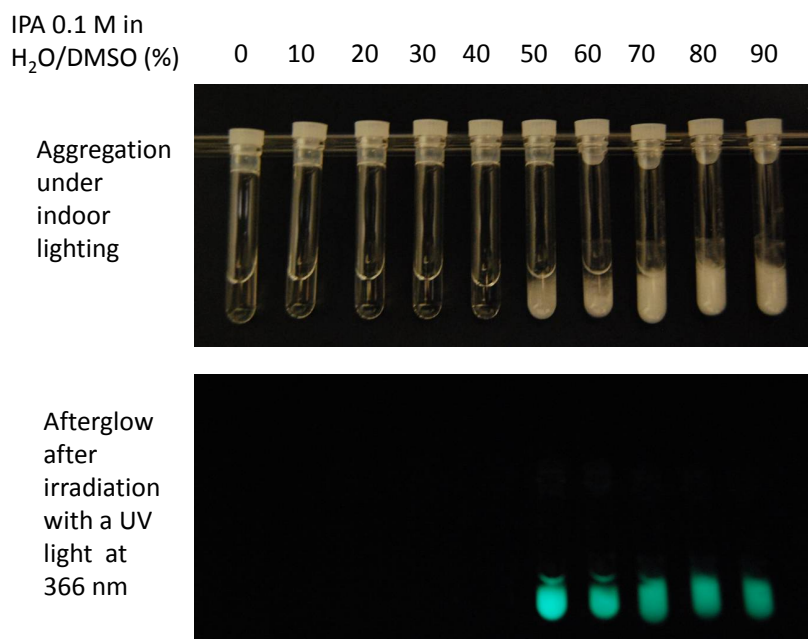

**Fig. S1** Aggregation-induced phosphorescence of IPA. To a solution of IPA in DMSO was added water so that the final concentration is 0.1 M. IPA was precipitated at the water concentration of no less than 50% (top). Afterglow was observed for only the precipitated samples (bottom).

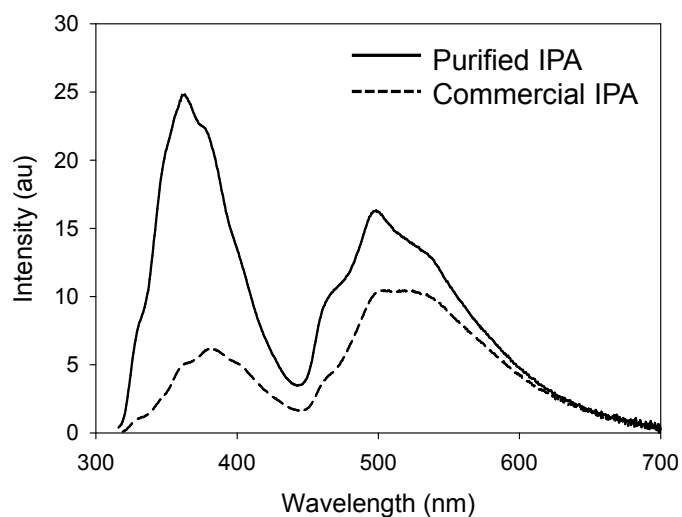

**Fig. S2** Phosphorescence spectra of purified and commercial IPAs at 296 K excited at 306 nm and 309 nm, respectively. The commercial IPA was purchased from Sigma-Aldrich and it was purified by the method in the main text. For the time-resolved spectrum, afterglows of 50–75 ms were measured. Excitation wavelengths with the maximum emission intensities were employed.

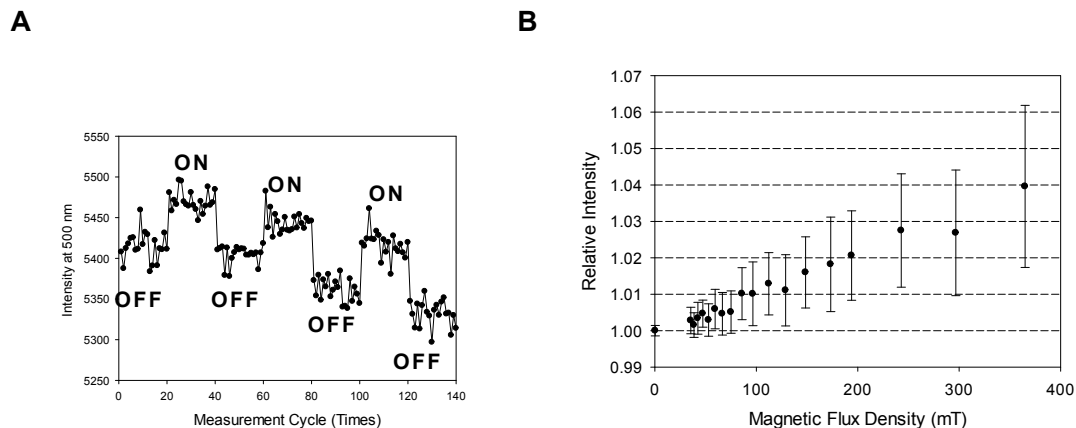

**Fig. S3** .Extended data for the magnetic field effect on the phosphorescence of IPA. (A) On-off magnetic-field (0.4 T) effects on the phosphorescence intensity at 500 nm of IPA. (B) The magnetic field effect at a higher region (up to 0.4 T). IPA was excited at 308 nm under an external magnetic field from a neodymium permanent magnet. Magnetic flux density was varied by changing the distance between IPA and the magnet. The data represent the mean value from four experiments and the error bars are  $\pm$ s.e.m.

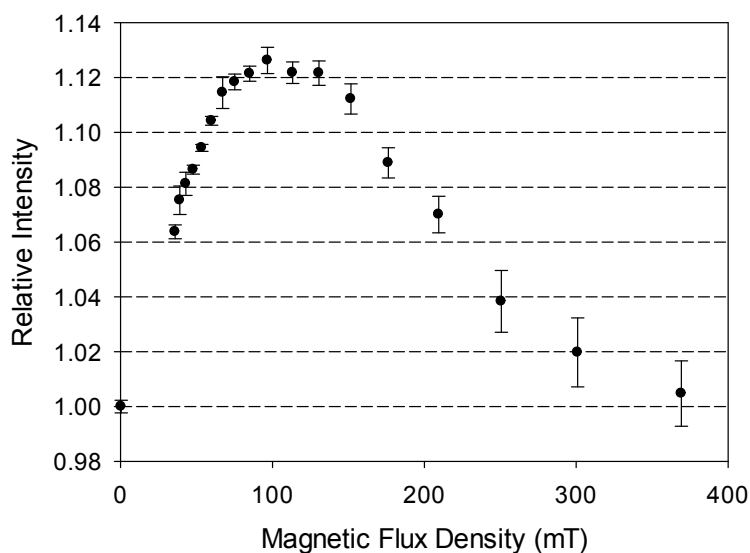

**Fig. S4** Magnetic field effect on the delayed fluorescence of IPA at 390 nm. IPA was excited at 308 nm under an external magnetic field from a neodymium permanent magnet. Magnetic flux density was varied up to 0.4 T by changing the distance between IPA and the magnet. The data represent the mean

value from six experiments and the error bars are  $\pm$ s.e.m.

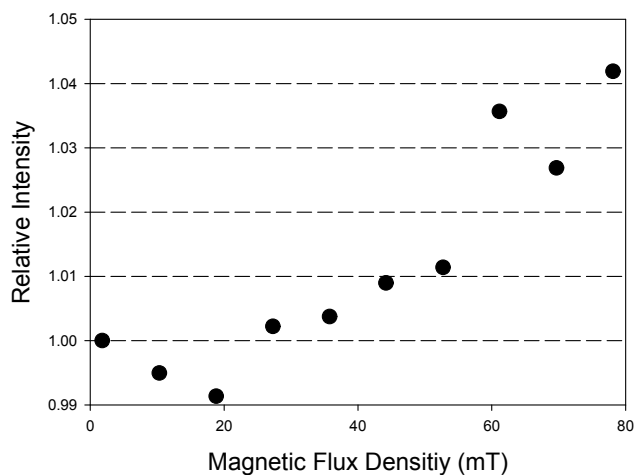

**Fig. S5** Magnetic field effect on the phosphorescence intensity at 525 nm of sodium 2-naphthate on a filtering paper. A solution of 2-naphthoic acid (10 mg) in 1 M NaOH (1 mL) was spotted on a filtering paper (NRK, No.704×22 m/m) and the spot was dried with a heat gun. The filtering paper was excited at 290 nm under an external magnetic field from an electromagnet connected to a constant voltage supply with the voltage variation between 0 and 90 V.

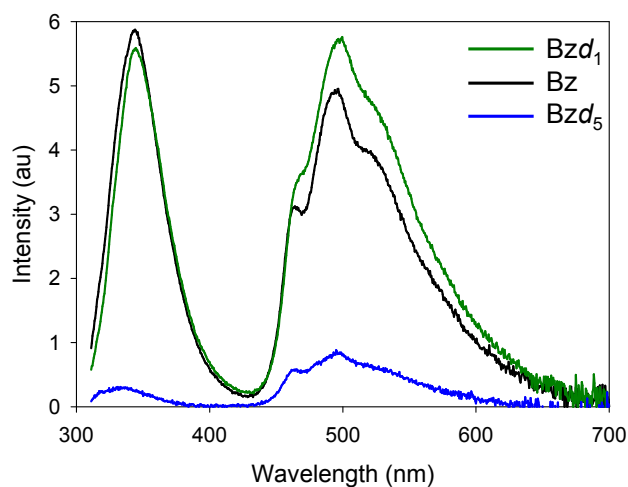

**Fig. S6** Magnetic isotope effects on the phosphorescence spectra of benzoic acid (Bz), Bzd<sub>1</sub>, and Bzd<sub>5</sub>. The excitation wavelength was 301 nm. For the time-resolved spectrum, afterglows of 50–75 ms were measured.

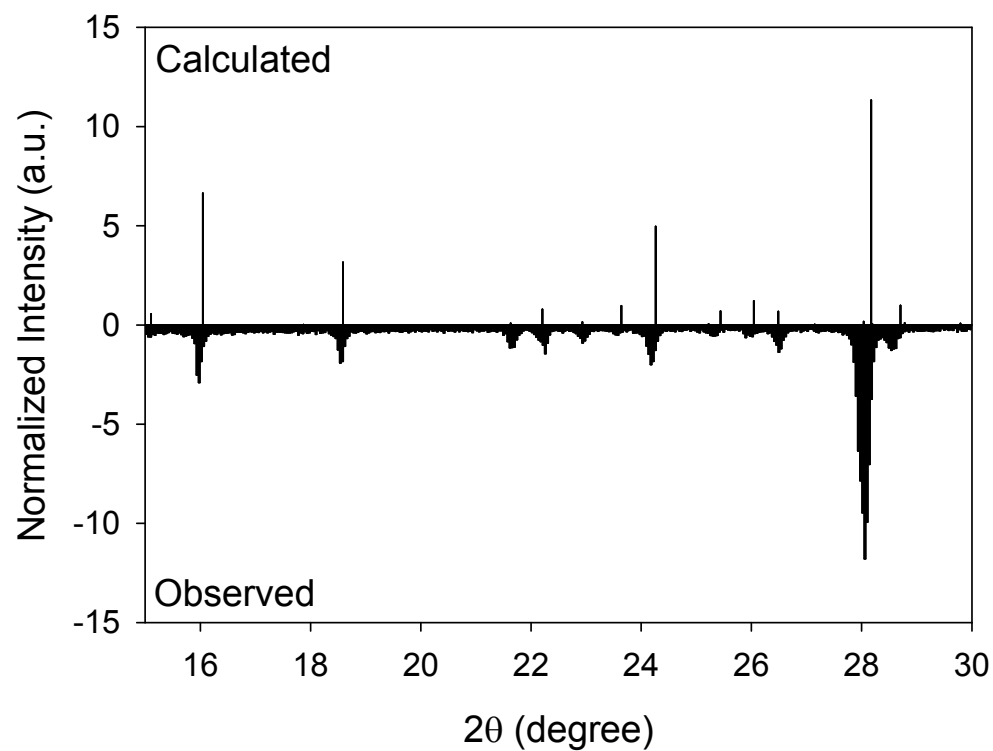

**Fig. S7** Simulated (positive) and observed (negative) XRD patterns of IPA. Powder X-ray diffraction (XRD) measurements were performed on an X-ray diffractometer for a pole point figure measurement, X'Pert-MPD-OEC, in the  $2\theta$  range between  $15^\circ$  and  $100^\circ$ . There was no significant peak above  $30^\circ$ . The peak intensities and signs are normalized so that they can be compared easily. The simulated XRD measurement was calculated for BENZDC10<sup>1</sup> with a Crystal Maker software, CrystalDiffract ver 1.4.5. BENZDC10 was taken from the Cambridge Structural DS 2013 data base.



**Fig. S8** CT-like photoexcitation of a Bz dimer. The Bz dimer structure (top left) was taken from the BENZAC01<sup>2</sup> file provided in Cambridge Structural DS 2013. The transitions at 213.3 nm and 213.7 nm with oscillator strengths (*f*) of 0.209 and 0.173, respectively were calculated by TD-DFT on CAM-B3LY at the 631Gd level with Gaussian 09<sup>3</sup>.

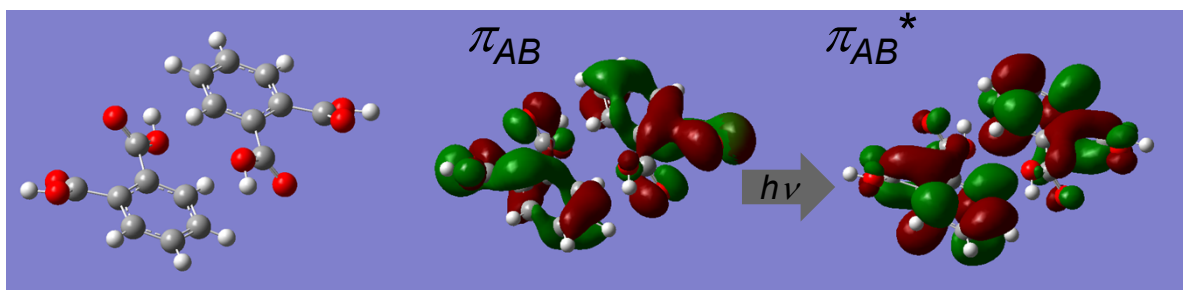

**Fig. S9** TD-DFT calculation for an OPA dimer. The OPA dimer structure (left) was taken from the PHTTHAC01 file provided in Cambridge Structural DS 2013; the molecular orbitals for the dimers were  $\pi_{AB}$  (middle) and  $\pi_{AB}^*$  (right). The distance between the two benzene rings is 4.85 Å. The  $\pi_{AB}$ - $\pi_{AB}^*$  transition at 198 nm with an oscillator strength of 0.50 was calculated by TD-DFT on CAM-B3LY at the 631Gd level with Gaussian 09<sup>3</sup>.

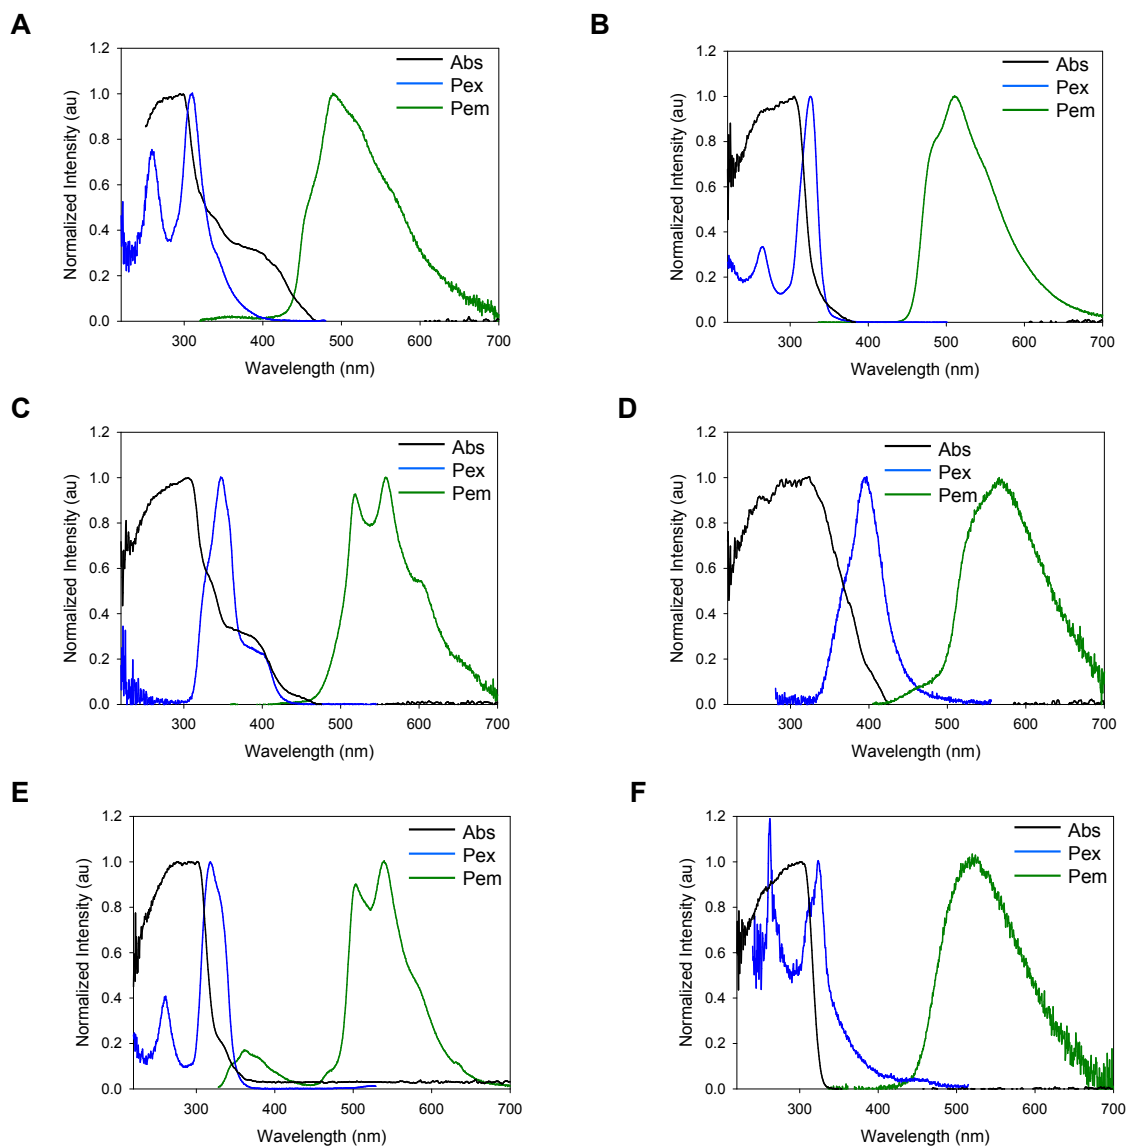

**Fig. S10** Absorption spectra (Abs) and phosphorescence excitation (P<sub>ex</sub>) and emission (P<sub>em</sub>) spectra at 296 K of the compounds stated in the main text. For the time-resolved spectra, afterglows of 50–75 ms (2FBz, 2ClBz, 2BrBz, 3FBz) or 11–18 ms (2IBz, 3ClBz) were measured. (A) 2FBz: excitation at 310 nm for P<sub>em</sub> and emission at 490 nm for P<sub>ex</sub>. (B) 2ClBz: excitation at 326 nm for P<sub>em</sub> and emission at 511 nm for P<sub>ex</sub>. (C) 2BrBz: excitation at 348 nm for P<sub>em</sub> and emission at 557 nm for P<sub>ex</sub>. (D) 2IBz: excitation at 395 nm for P<sub>em</sub> and emission at 566 nm for P<sub>ex</sub>. (E) 3FBz: excitation at 318 nm for P<sub>em</sub> and emission at 539 nm for P<sub>ex</sub>. (F) 3ClBz: excitation at 324 nm for P<sub>em</sub> and emission at 525 nm for P<sub>ex</sub>.

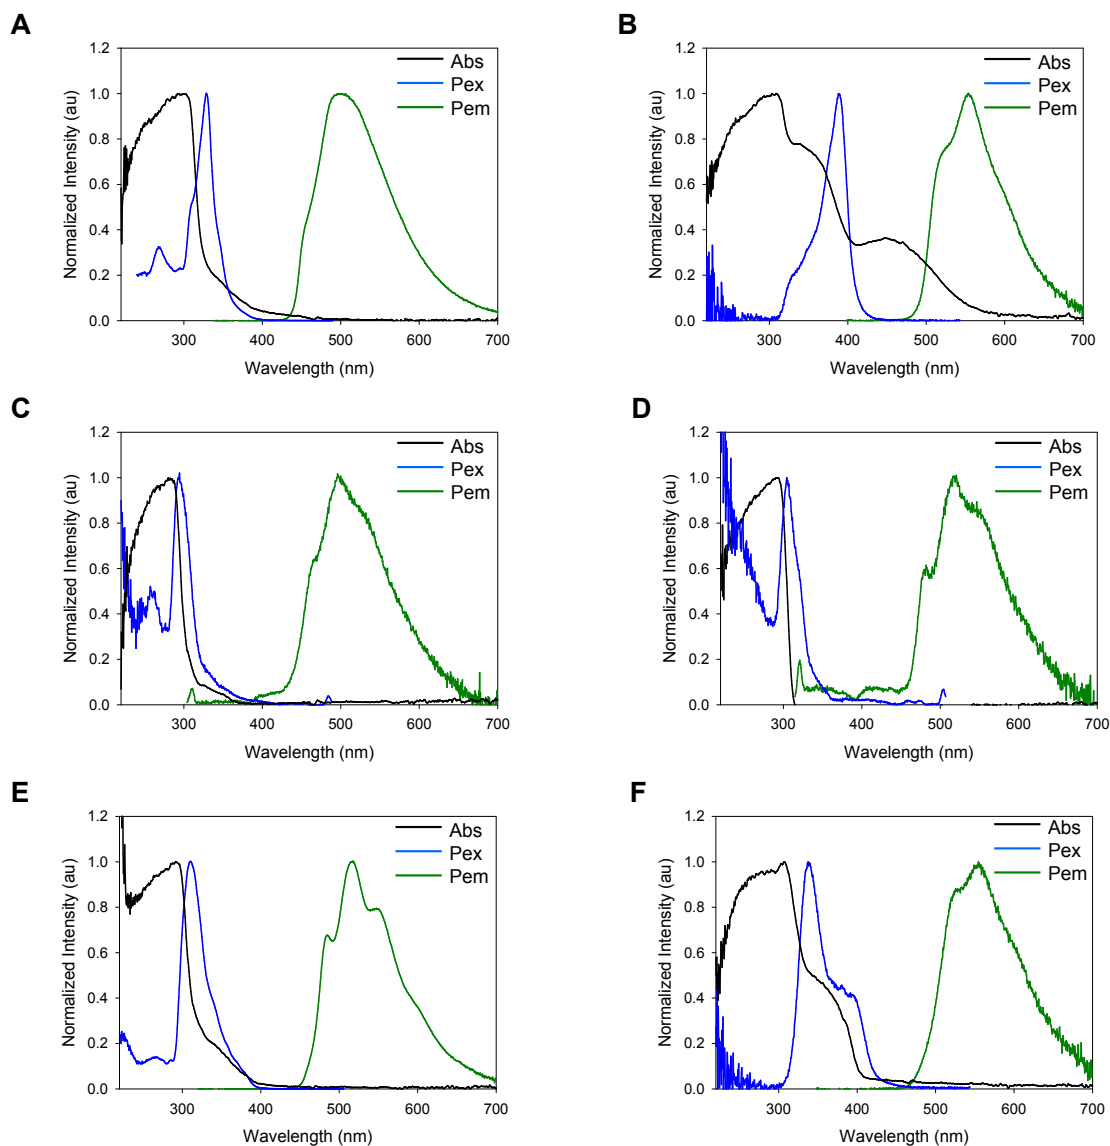

**Fig. S11** Absorption spectra (Abs) and phosphorescence excitation ( $P_{ex}$ ) and emission ( $P_{em}$ ) spectra at 296 K of the compounds stated in the main text. For the time-resolved spectra, afterglows of 50–75 ms (3IBz, 4FBz, 4ClBz, 4BrBz) or 11–18 ms (3BrBz, 4IBz) were measured. (A) 3BrBz: excitation at 329 nm for  $P_{em}$  and emission at 500 nm for  $P_{ex}$ . (B) 3IBz: excitation at 388 nm for  $P_{em}$  and emission at 553 nm for  $P_{ex}$ . (C) 4FBz: excitation at 294 nm for  $P_{em}$  and emission at 498 nm for  $P_{ex}$ . (D) 4ClBz: excitation at 305 nm for  $P_{em}$  and emission at 517 nm for  $P_{ex}$ . (E) 4BrBz: excitation at 310 nm for  $P_{em}$  and emission at 515 nm for  $P_{ex}$ . (F) 4IBz: excitation at 338 nm for  $P_{em}$  and emission at 554 nm for  $P_{ex}$ .

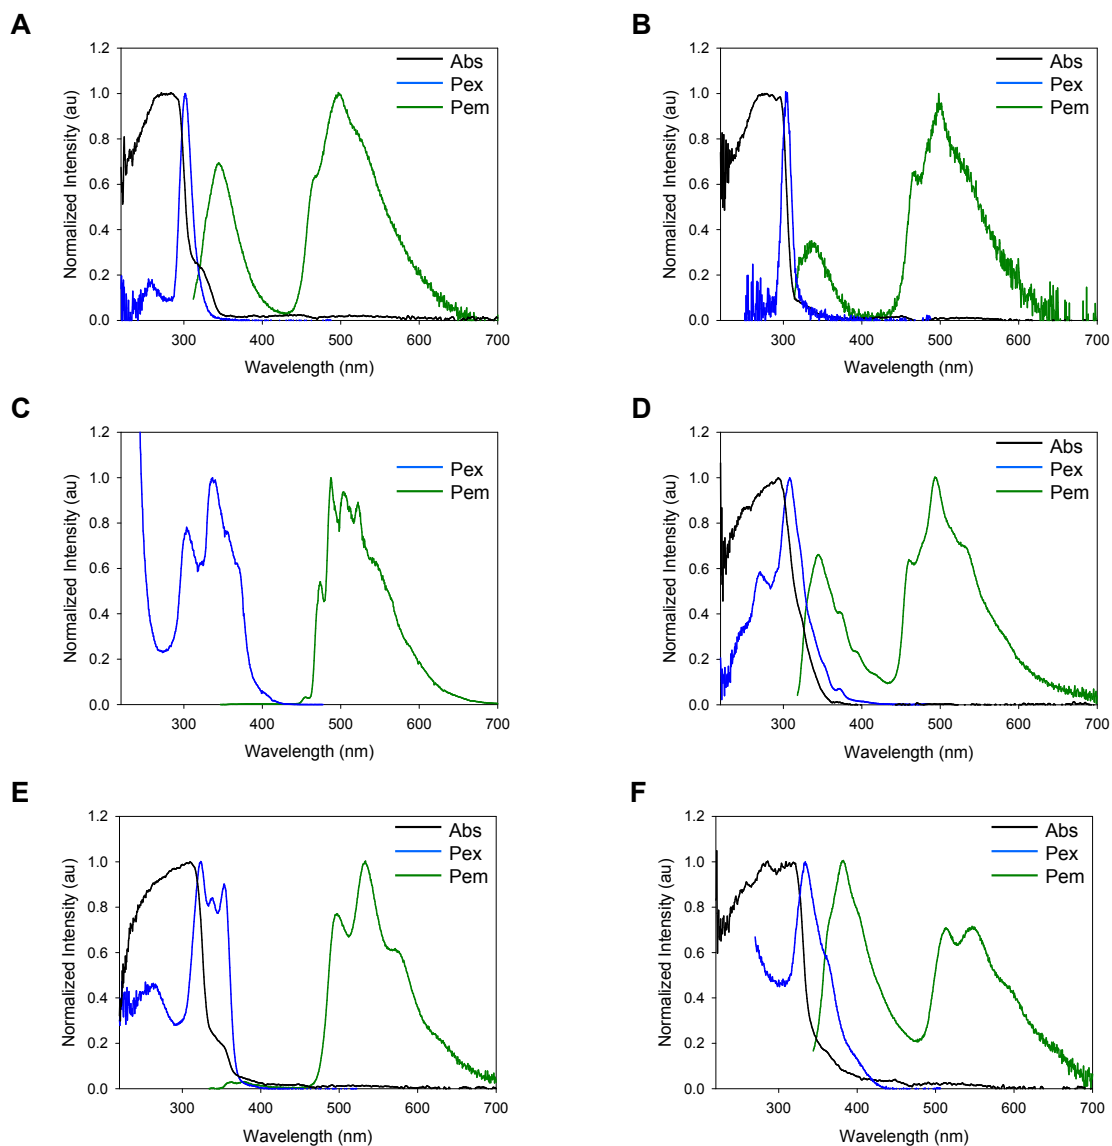

**Fig. S12** Absorption spectra (Abs) and phosphorescence excitation ( $P_{ex}$ ) and emission ( $P_{em}$ ) spectra at 296 K of the compounds stated in the main text. For the time-resolved spectra, afterglows of 50–75 ms were measured. (A) Bz: excitation at 302 nm for  $P_{em}$  and emission at 498 nm for  $P_{ex}$ . (B)  $Bzd_5$ : excitation at 301 nm for  $P_{em}$  and emission at 495 nm for  $P_{ex}$ . (C) IPA77K: excitation at 305 nm for  $P_{em}$  and emission at 456 nm for  $P_{ex}$ . (D)  $IPAd_4$ : excitation at 308 nm for  $P_{em}$  and emission at 495 nm for  $P_{ex}$ . (E) PMA: excitation at 324 nm for  $P_{em}$  and emission at 533 nm for  $P_{ex}$ . (F) TPA: excitation at 334 nm for  $P_{em}$  and emission at 516 nm for  $P_{ex}$ .

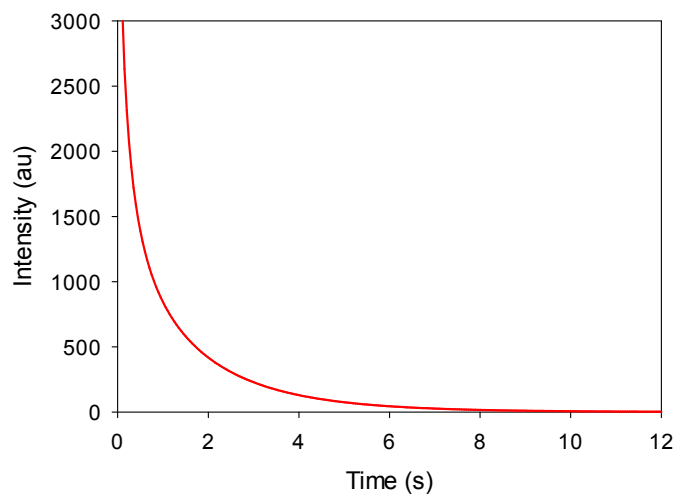

**Fig. S13** Decay curve of the phosphorescence of IPA.

**Table S1** Inductively coupled plasma atomic emission spectrometry (ICP-AES) analysis of IPA in comparison with the blank analysis in ppm.<sup>a</sup>

|       | S   | K   | I   | Na   | P    | U    | Mg     | Ca     | Si    | Fe     | Cu     |
|-------|-----|-----|-----|------|------|------|--------|--------|-------|--------|--------|
| Blank | 3.1 | 1.7 | 3.3 | 0.47 | 0.62 | 0.45 | 0.0022 | 0.0055 | 0.017 | 0.0083 | 0.011  |
| IPA   | 3.3 | 1.4 | 3.0 | 0.58 | 0.67 | 0.47 | 0.0023 | 0.0062 | 0.029 | 0.011  | 0.0073 |

<sup>a</sup>ICP-AES was performed on Shimadzu ICPS-8100.

**Table S2** Spectroscopic properties of the phosphorescent aromatic compounds.<sup>a</sup>

| Compound <sup>b</sup>   | F <sub>ex</sub> (nm) | F (nm) | P <sub>ex</sub> (nm) | P (nm) | DF (nm) | Φ (%)           |
|-------------------------|----------------------|--------|----------------------|--------|---------|-----------------|
| IPA                     | 313                  | 363    | 309                  | 501    | 382     | 28              |
| IPA at 77K <sup>c</sup> | 302                  | 355    | 305                  | 456    | -       | ND <sup>d</sup> |
| IPAd <sub>2</sub>       | 315                  | 366    | 308                  | 500    | 382     | 32              |
| IPAd <sub>4</sub>       | 310                  | 346    | 308                  | 495    | 345     | 20              |
| TPA                     | 319                  | 341    | 334                  | 516    | 383     | 18              |
| PMA                     | 338                  | 379    | 324                  | 533    | -       | 9.2             |
| Bz                      | 260                  | 308    | 301                  | 495    | 344     | 13              |
| Bzd <sub>1</sub>        | 260                  | 308    | 301                  | 499    | 344     | 13              |
| Bzd <sub>5</sub>        | 260                  | 308    | 301                  | 495    | 335     | 13              |
| 2FBz                    | 303                  | 357    | 310                  | 490    | -       | 3.1             |
| 2ClBz                   | 327                  | 511    | 326                  | 511    | -       | 12              |
| 2BrBz                   | 329                  | 511    | 348                  | 557    | -       | 6.7             |
| 2IBz                    | 398                  | 501    | 395                  | 566    | -       | 14              |
| 3FBz                    | 320                  | 362    | 318                  | 539    | 361     | 19              |
| 3ClBz                   | 314                  | 339    | 324                  | 525    | -       | 0.42            |
| 3BrBz                   | 389                  | 495    | 329                  | 500    | -       | 2               |
| 3IBz                    | 400                  | 506    | 388                  | 553    | -       | 1.3             |
| 4FBz                    | 263                  | 316    | 294                  | 498    | -       | 5.8             |
| 4ClBz                   | 295                  | 313    | 305                  | 517    | -       | 1.6             |
| 4BrBz                   | 310                  | 516    | 310                  | 516    | -       | 9.0             |
| 4IBz                    | 400                  | 505    | 338                  | 554    | -       | 0.038           |

<sup>a</sup>Peak wavelengths of fluorescence excitation (F<sub>ex</sub>), fluorescence (F), phosphorescence excitation (P<sub>ex</sub>), phosphorescence (P), and delayed fluorescence (DF) and fluorescence quantum yield (Φ). <sup>b</sup>Abbreviation of compounds: IPA, isophthalic acid; IPAd<sub>2</sub>, isophthalic acid-*d*<sub>2</sub> (*O*-deuterated); IPAd<sub>4</sub>, isophthalic acid-*d*<sub>4</sub> (*C*-deuterated); TPA, terephthalic acid; PMA, pyromellitic acid; Bz, benzoic acid; Bzd<sub>1</sub>, benzoic acid-*d*<sub>1</sub> (*O*-deuterated); Bzd<sub>5</sub>, benzoic acid-*d*<sub>5</sub> (*C*-deuterated); general abbreviation for #XBz such as 2FBz, #-halogenated benzoic acid such as 2-fluorobenzoic acid. <sup>c</sup>All the other entries employ room temperature. <sup>d</sup>Not determined.

**Table S3** Lifetime parameters of phosphorescence.<sup>a</sup>

| Compound <sup>b</sup>   | $\tau_1 / \text{s}^{-1} (A_1)$ | $\tau_2 / \text{s}^{-1} (A_2)$ | $\tau_3 / \text{s}^{-1} (A_3)$ | $\tau_4 / \text{s}^{-1} (A_4)$ | $\tau_5 / \text{s}^{-1} (A_5)$ | $\tau_{\text{Ave}} / \text{s}^{-1}$ |
|-------------------------|--------------------------------|--------------------------------|--------------------------------|--------------------------------|--------------------------------|-------------------------------------|
| IPA                     | 2.9 (4.7%)                     | 1.6 (41%)                      | 0.44 (30%)                     | 0.14 (24%)                     | -                              | 0.97                                |
| IPA at 77K <sup>c</sup> | 7.2 (9.4%)                     | 4.3 (91%)                      | -                              | -                              | -                              | 4.4                                 |
| IPAd <sub>2</sub>       | 2.8 (9.4%)                     | 1.6 (43%)                      | 0.22 (40%)                     | 0.047 (7.2%)                   | -                              | 1.1                                 |
| IPAd <sub>4</sub>       | 4.3 (3.6%)                     | 2.3 (2.1%)                     | 0.69 (10%)                     | 0.19 (27%)                     | 0.081 (57%)                    | 0.37                                |
| TPA                     | 0.80 (24%)                     | 0.46 (36%)                     | 0.13 (40%)                     | -                              | -                              | 0.41                                |
| PMA                     | 1.2 (79%)                      | 0.84 (16%)                     | 0.35 (5.3%)                    | -                              | -                              | 1.1                                 |
| Bz                      | 0.74 (5.6%)                    | 0.41 (26%)                     | 0.16 (69%)                     | -                              | -                              | 0.26                                |
| Bzd <sub>1</sub>        | 0.94 (18%)                     | 0.45 (41%)                     | 0.16 (41%)                     | -                              | -                              | 0.42                                |
| Bzd <sub>5</sub>        | 1.1 (3.9%)                     | 0.36 (22%)                     | 0.18 (74%)                     | -                              | -                              | 0.26                                |
| 2FBz                    | 1.3 (3.2%)                     | 0.61 (23%)                     | 0.27 (41%)                     | 0.089 (33%)                    | -                              | 0.32                                |
| 2ClBz                   | 0.93 (0.090%)                  | 0.19 (56%)                     | 0.12 (43%)                     | -                              | -                              | 0.16                                |
| 2BrBz                   | 0.31 (3.0%)                    | 0.11 (64%)                     | 0.042 (33%)                    | -                              | -                              | 0.093                               |
| 2IBz                    | 0.016 (100%)                   | -                              | -                              | -                              | -                              | 0.016                               |
| 3FBz                    | 1.1 (58%)                      | 0.89 (32%)                     | 0.091 (10%)                    | -                              | -                              | 0.94                                |
| 3ClBz                   | 3.1 (0.35%)                    | 0.52 (9.8%)                    | 0.14 (31%)                     | 0.038 (58%)                    | -                              | 0.13                                |
| 3BrBz                   | 0.29 (3.4%)                    | 0.098 (19%)                    | 0.033 (46%)                    | 0.012 (31%)                    | -                              | 0.048                               |
| 3IBz                    | 0.96 (0.016%)                  | 0.15 (1.1%)                    | 0.095 (6.0%)                   | 0.033 (83%)                    | 0.012 (9.5%)                   | 0.036                               |
| 4FBz                    | 1.1 (7.0%)                     | 0.47 (34%)                     | 0.21 (48%)                     | 0.033 (11%)                    | -                              | 0.34                                |
| 4ClBz                   | 0.69 (8.7%)                    | 0.31 (46%)                     | 0.092 (23%)                    | 0.021 (22%)                    | -                              | 0.23                                |
| 4BrBz                   | 0.41 (6.6%)                    | 0.23 (9.7%)                    | 0.098 (84%)                    | -                              | -                              | 0.13                                |
| 4IBz                    | 0.020 (100%)                   | -                              | -                              | -                              | -                              | 0.020                               |

<sup>a</sup>Phosphorescence decay curves were obtained at the peak wavelengths of phosphorescence (P) indicated in Table S2. Fractional lifetimes  $\tau_n / \text{s}^{-1}$ , contribution coefficients  $A_n$  in parentheses and average lifetimes  $\tau_{\text{ave}} / \text{s}$ . <sup>b</sup>Abbreviation of compounds: IPA, isophthalic acid; IPAd<sub>2</sub>, isophthalic acid-*d*<sub>2</sub> (*O*-deuterated); IPAd<sub>4</sub>, isophthalic acid-*d*<sub>4</sub> (*C*-deuterated); TPA, terephthalic acid; PMA, pyromellitic acid; Bz, benzoic acid; Bzd<sub>1</sub>, benzoic acid-*d*<sub>1</sub> (*O*-deuterated); Bzd<sub>5</sub>, benzoic acid-*d*<sub>5</sub> (*C*-deuterated); general abbreviation for #XBz such as 2FBz, #-halogenated benzoic acid such as 2-fluorobenzoic acid. <sup>c</sup>All the other entries employ room temperature.

**Table S4** Lifetime parameters of delayed fluorescence.<sup>a</sup>

| Compound <sup>b</sup> | $\tau_1 / \text{s}^{-1} (A_1)$ | $\tau_2 / \text{s}^{-1} (A_2)$ | $\tau_3 / \text{s}^{-1} (A_3)$ | $\tau_4 / \text{s}^{-1} (A_4)$ | $\tau_{\text{Ave}} / \text{s}^{-1}$ |
|-----------------------|--------------------------------|--------------------------------|--------------------------------|--------------------------------|-------------------------------------|
| IPA                   | 0.66 (2.1%)                    | 0.23 (32%)                     | 0.097 (66%)                    | -                              | 0.15                                |
| IPAd <sub>2</sub>     | 1.7 (0.21%)                    | 0.43 (5.8%)                    | 0.16 (46%)                     | 0.061 (48%)                    | 0.13                                |
| IPAd <sub>4</sub>     | 0.10 (11%)                     | 0.045 (89%)                    | -                              | -                              | 0.051                               |
| TPA                   | 0.29 (12%)                     | 0.11 (51%)                     | 0.044 (37%)                    | -                              | 0.11                                |
| Bz                    | 0.17 (27%)                     | 0.084 (73%)                    | -                              | -                              | 0.11                                |
| Bzd <sub>1</sub>      | 0.32 (14%)                     | 0.15 (63%)                     | 0.061 (23%)                    | -                              | 0.15                                |
| Bzd <sub>5</sub>      | 0.14 (58%)                     | 0.10 (20%)                     | 0.053 (22%)                    | -                              | 0.10                                |
| 3FBz                  | 0.36 (28%)                     | 0.19 (35%)                     | 0.052 (36%)                    | -                              | 0.19                                |

<sup>a</sup>Delayed fluorescence decay curves were obtained at the peak wavelengths of delayed fluorescence (DF) indicated in Table S2. Fractional lifetimes  $\tau_n / \text{s}^{-1}$ , contribution coefficients  $A_n$  in parentheses and average lifetimes  $\tau_{\text{Ave}} / \text{s}$ . <sup>b</sup>Abbreviation of compounds: IPA, isophthalic acid; IPAd<sub>2</sub>, isophthalic acid-*d*<sub>2</sub> (*O*-deuterated); IPAd<sub>4</sub>, isophthalic acid-*d*<sub>4</sub> (*C*-deuterated); TPA, terephthalic acid; Bz, benzoic acid; Bzd<sub>1</sub>, benzoic acid-*d*<sub>1</sub> (*O*-deuterated); Bzd<sub>5</sub>, benzoic acid-*d*<sub>5</sub> (*C*-deuterated); 3FBz, 3-fluorobenzoic acid.

### Notes and references for supplementary information

1. R. Alcalá and S. Martínez-Carrera, *Acta Crystallogr., Sect. B: Struct. Crystallogr. Cryst. Chem.*, 1972, **28**, 1671-1677.
2. G. Bruno and L. Randaccio, *Acta Crystallogr., Sect. B: Struct. Crystallogr. Cryst. Chem.*, 1980, **36**, 1711-1712.
3. M. J. Frisch, G. W. Trucks, H. B. Schlegel, G. E. Scuseria, M. A. Robb, J. R. Cheeseman, G. Scalmani, V. Barone, B. Mennucci, G. A. Petersson, H. Nakatsuji, M. Caricato, X. Li, H. P. Hratchian, A. F. Izmaylov, J. Bloino, G. Zheng, J. L. Sonnenberg, M. Hada, M. Ehara, K. Toyota, R. Fukuda, J. Hasegawa, M. Ishida, T. Nakajima, Y. Honda, O. Kitao, H. Nakai, T. Vreven, J. A. Montgomery, Jr., J. E. Peralta, F. Ogliaro, M. Bearpark, J. J. Heyd, E. Brothers, K. N. Kudin, V. N. Staroverov, T. Keith, R. Kobayashi, J. Normand, K. Raghavachari, A. Rendell, J. C. Burant, S. S. Iyengar, J. Tomasi, M. Cossi, N. Rega, J. M. Millam, M. Klene, J. E. Knox, J. B. Cross, V. Bakken, C. Adamo, J. Jaramillo, R. Gomperts, R. E. Stratmann, O. Yazyev, A. J. Austin, R. Cammi, C. Pomelli, J. W. Ochterski, R. L. Martin, K. Morokuma, V. G. Zakrzewski, G. A. Voth, P. Salvador, J. J. Dannenberg, S. Dapprich, A. D. Daniels, O. Farkas, J. B. Foresman, J. V. Ortiz, J. Cioslowski and D. J. Fox, Gaussian 09, Revision C.01, Gaussian, Inc., Wallingford CT, 2010.
